# Supplementary material
Source: PubMed Central journal article supplement (PMC2851864)
Supplement: 1001755107_pnas.201001755SI.pdf [file 1001755107_pnas.201001755SI.pdf]

# Supporting Information

Barber et al. 10.1073/pnas.1001755107

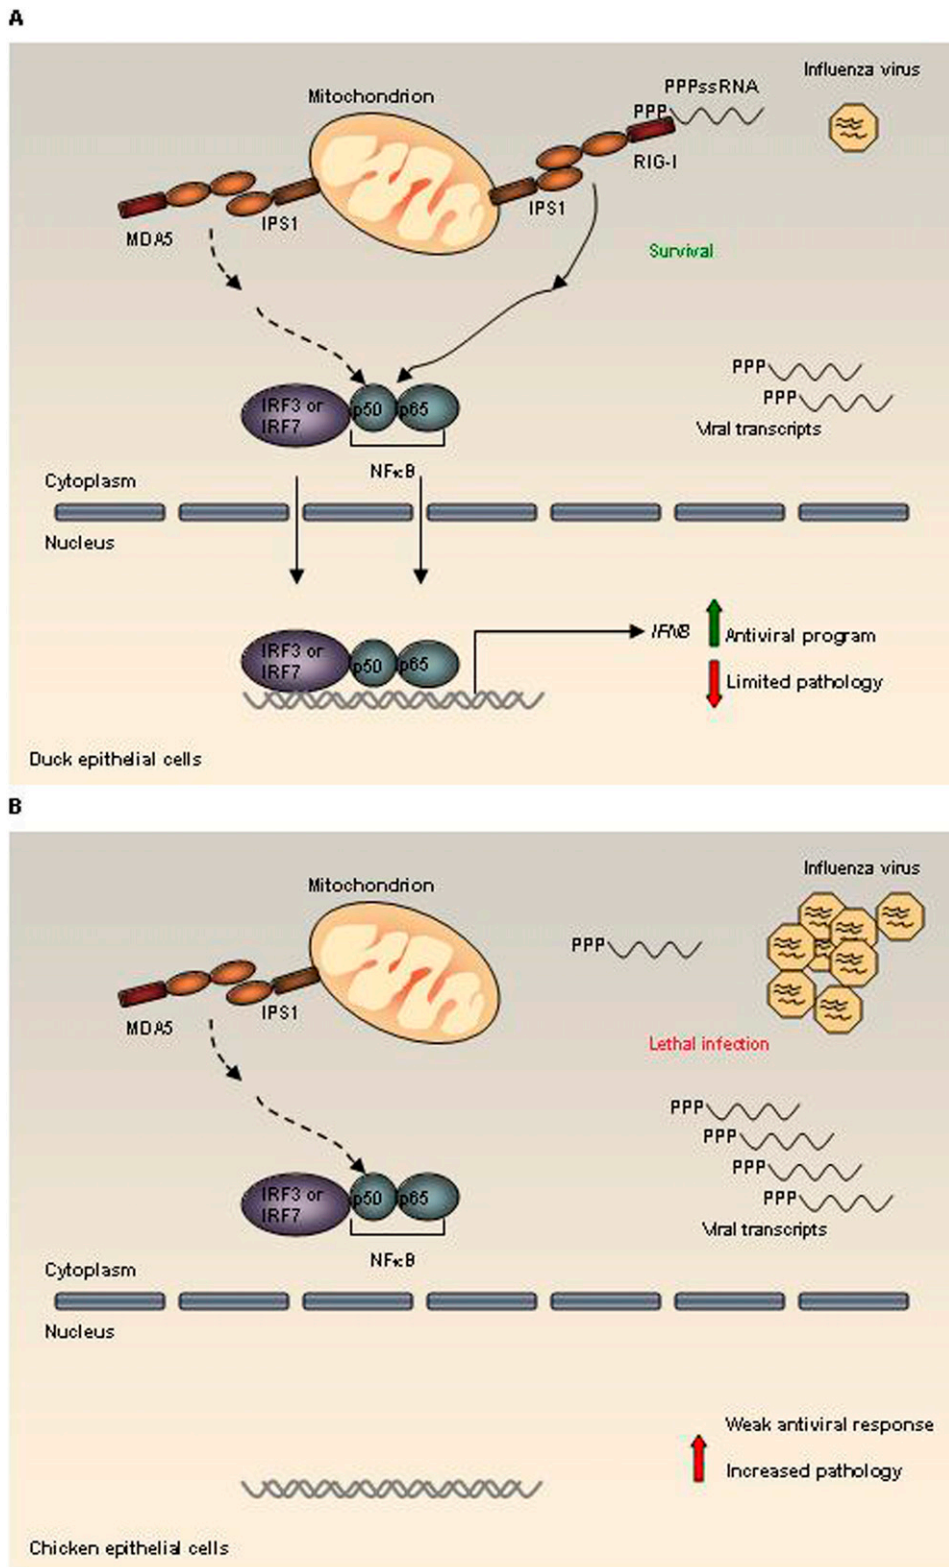

Legend continued on following page

**Fig. S1.** RIG-I detection of influenza viral RNA triggers the IFN response in duck epithelial cells, whereas chickens apparently lack RIG-I. MDA5 and RIG-I, pattern-recognition receptors, initiate signaling pathways that converge at the activation of the transcription factors IFN-regulatory factor 3 (IRF3), IRF7, and/or nuclear factor- $\kappa$ B; this leads to the expression of IFN- $\beta$ . (A) Hypothetically, in duck epithelial cells, influenza infection stimulates IFN- $\beta$  production and an antiviral program that reduces viral replication. (B) In chicken epithelial cells lacking RIG-I, there is a delayed or weak antiviral program and influenza rapidly replicates to cause a lethal infection. PPP, 5' triphosphate.

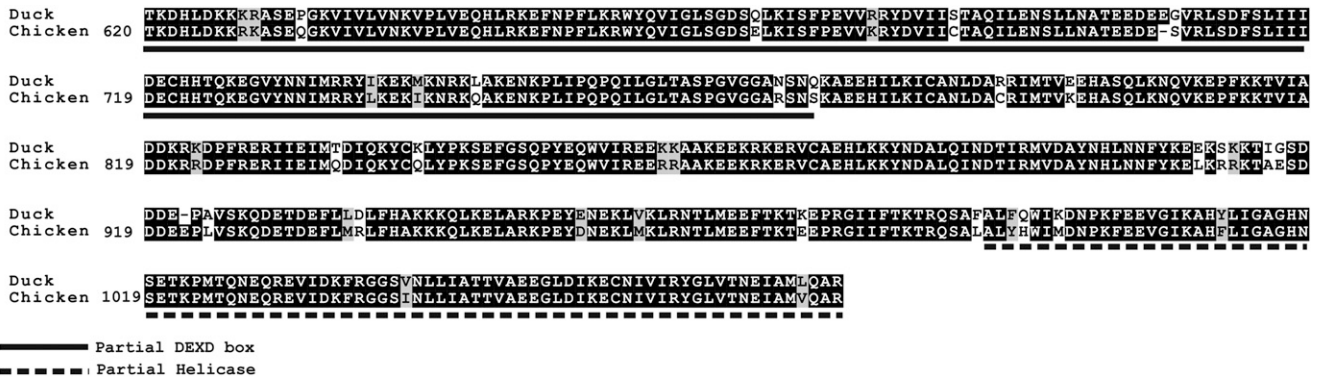

**Fig. S2.** Duck and chicken MDA5 are highly conserved. Alignment of partial duck MDA5 (accession no. GU936632) and chicken MDA5 (accession no. XM\_422031) was performed using the ClustalW program and edited with Boxshade. Black shading indicates amino acid identity and gray shading indicates similarity (50% threshold). A partial duck MDA5 clone was amplified using primers based on the chicken sequence: forward mda5 5'-AGT GGC AAA ACC AGA GTG GCT GTT TA-3' and reverse mda5 5'-CAT CAG CTC GAG CTC GAC CC-3'.
